# Supplementary material for: Anionic wood nanofibers produced from unbleached mechanical pulp by highly efficient chemical modification
Source: Royal Society of Chemistry journal article supplement (doi:10.1039/c7ta05668k), 2017-01-01
Supplement: c7ta05668k1.pdf [file c7ta05668k1.pdf]

# **Anionic wood nanofibers produced from unbleached mechanical pulp by highly efficient chemical modification**

**Juho Antti Sirviö,\* Miikka Visanko**

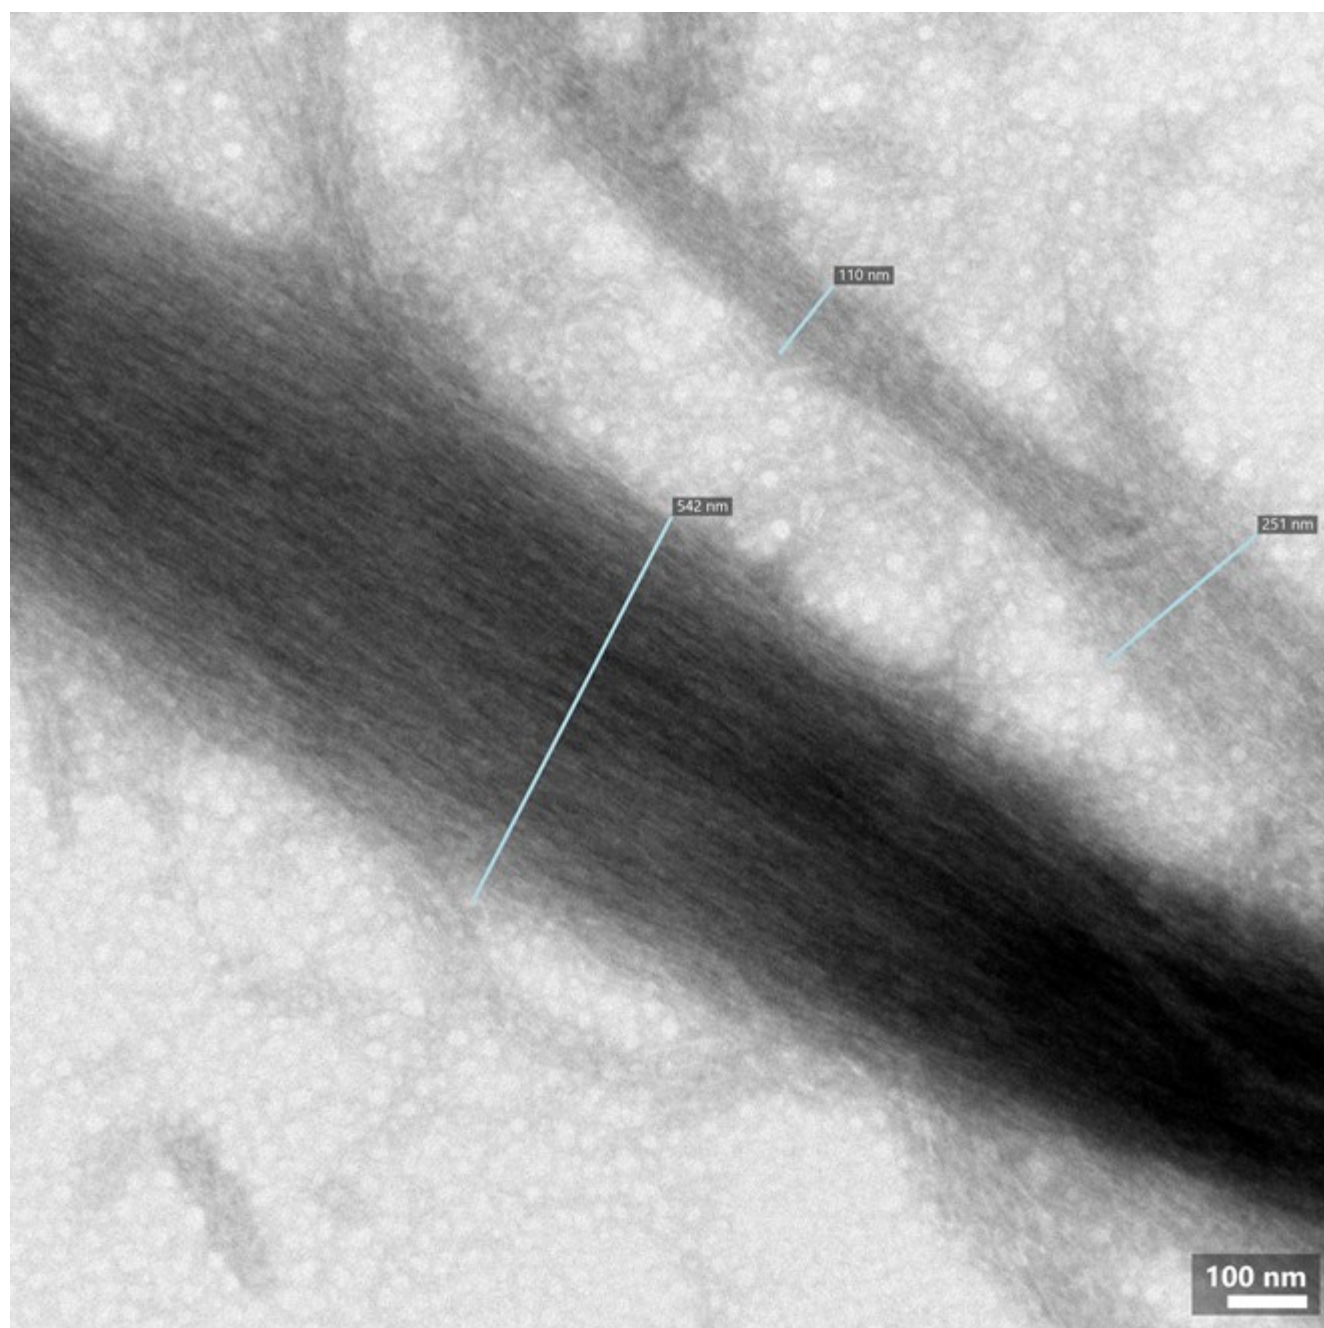

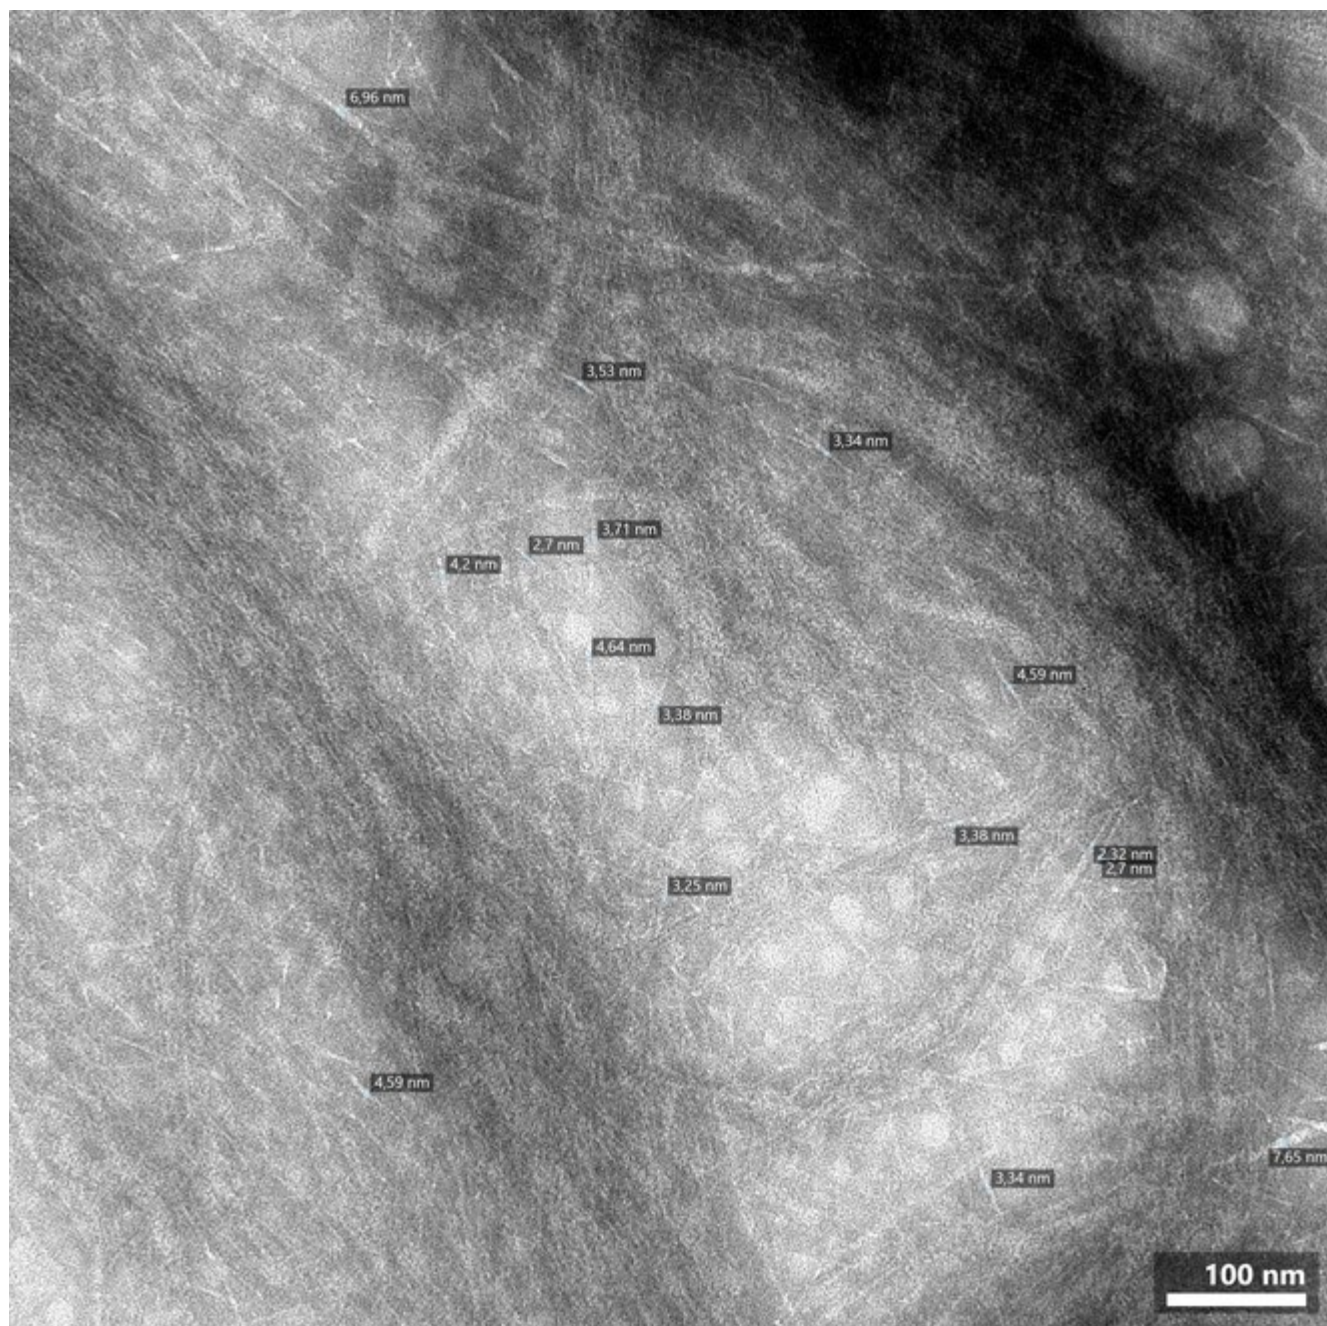



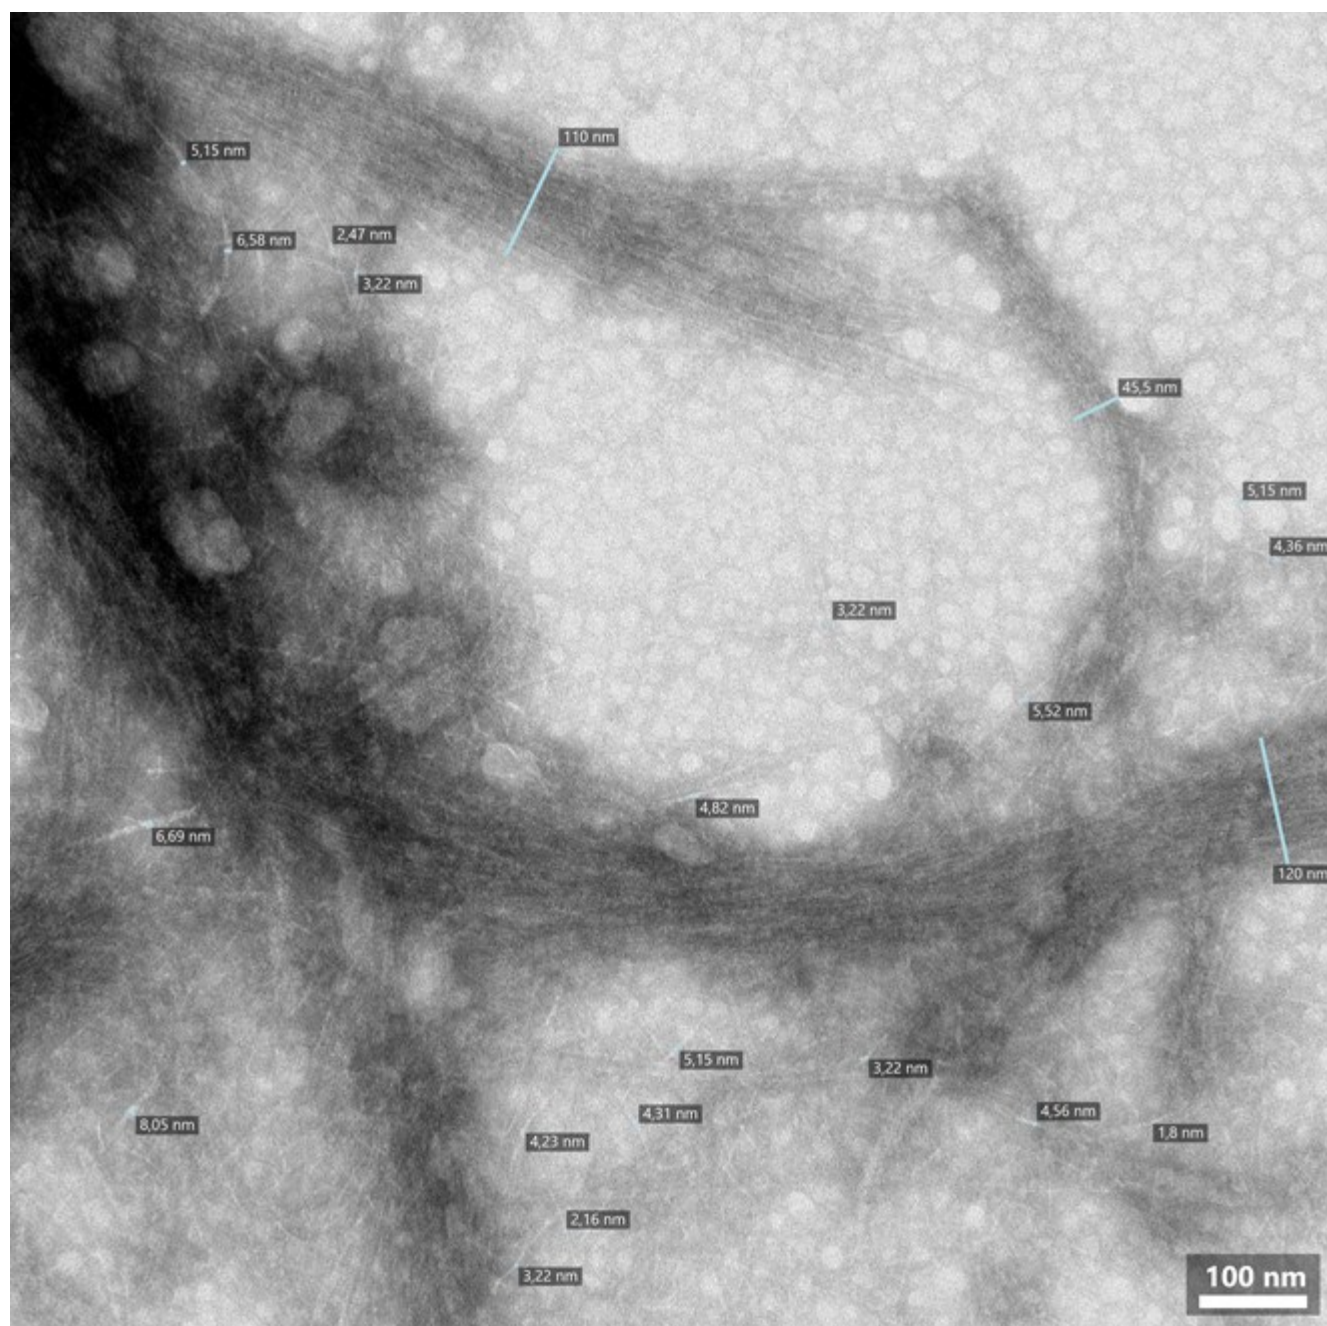

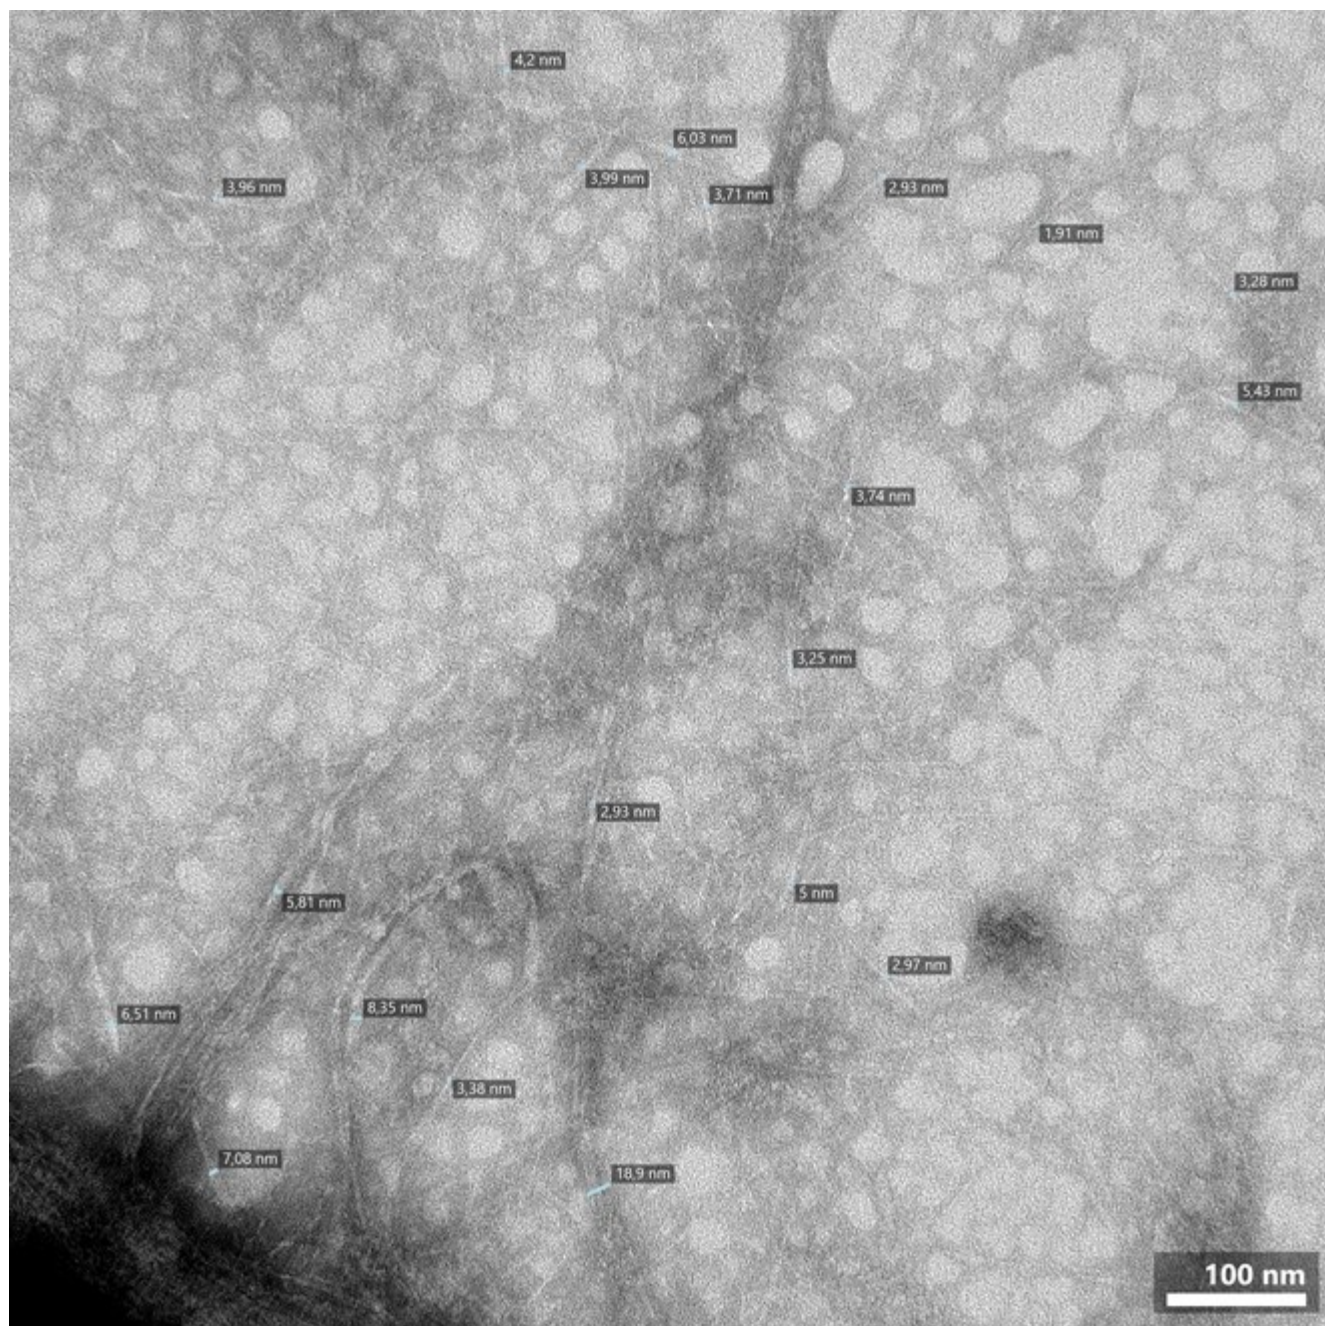



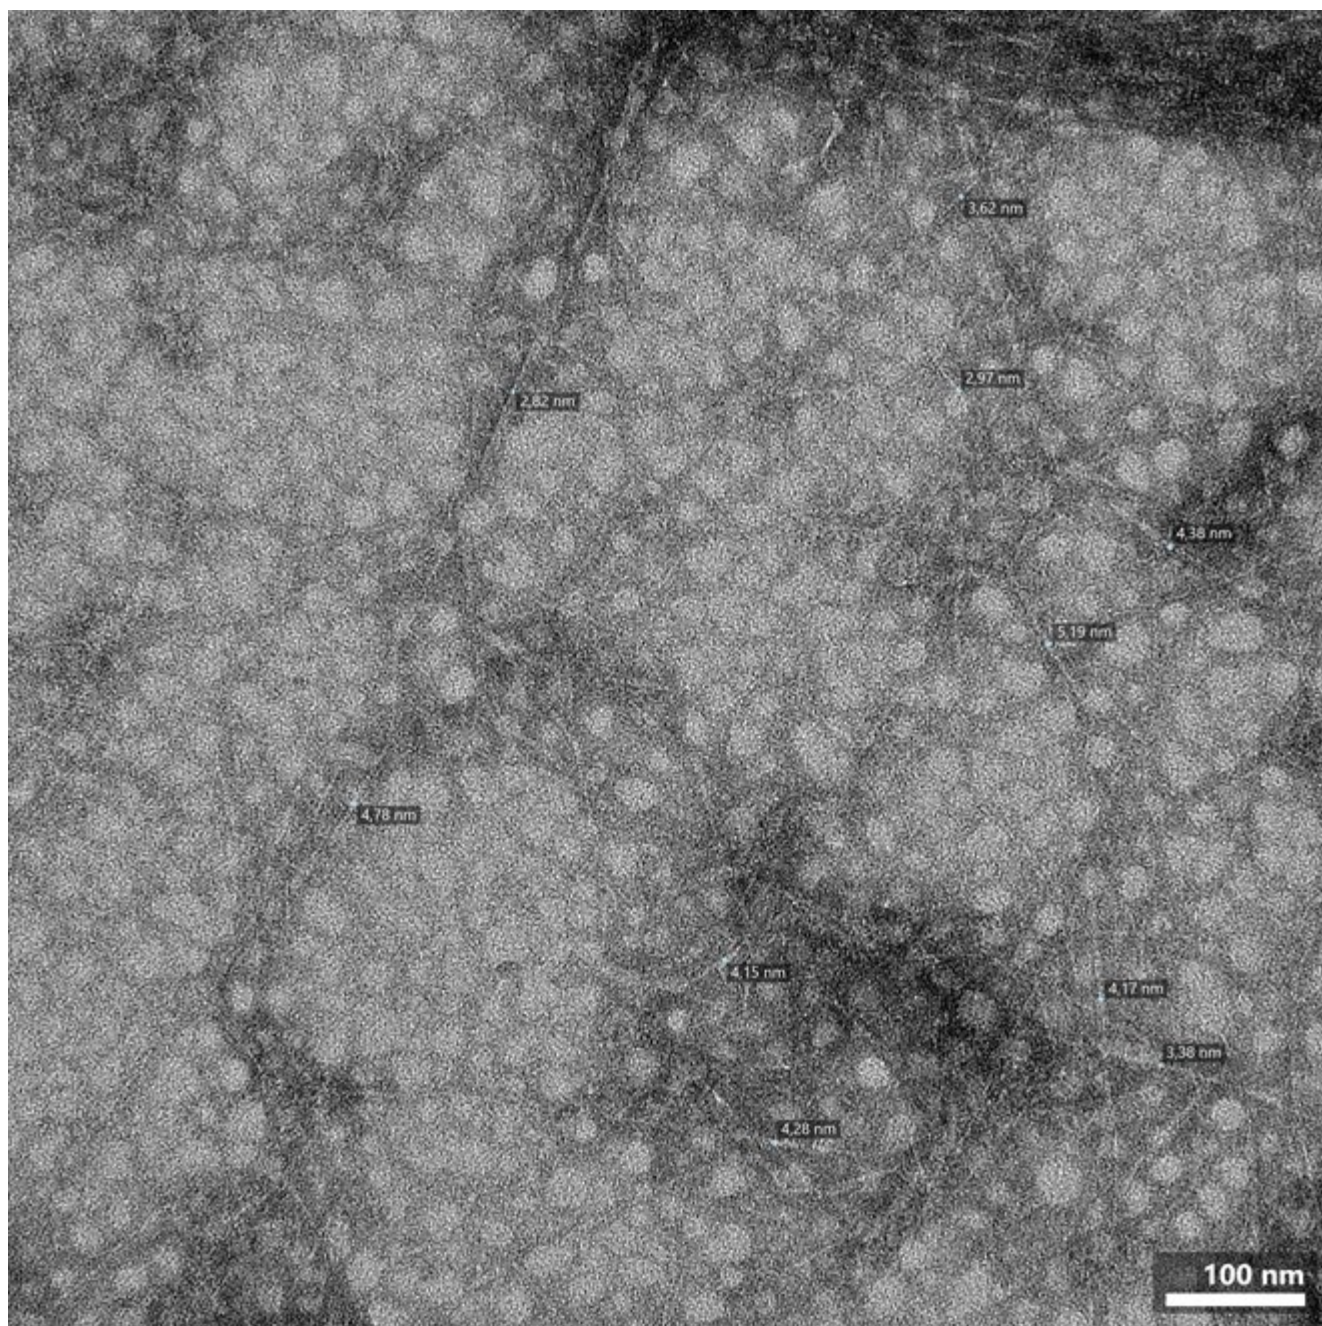



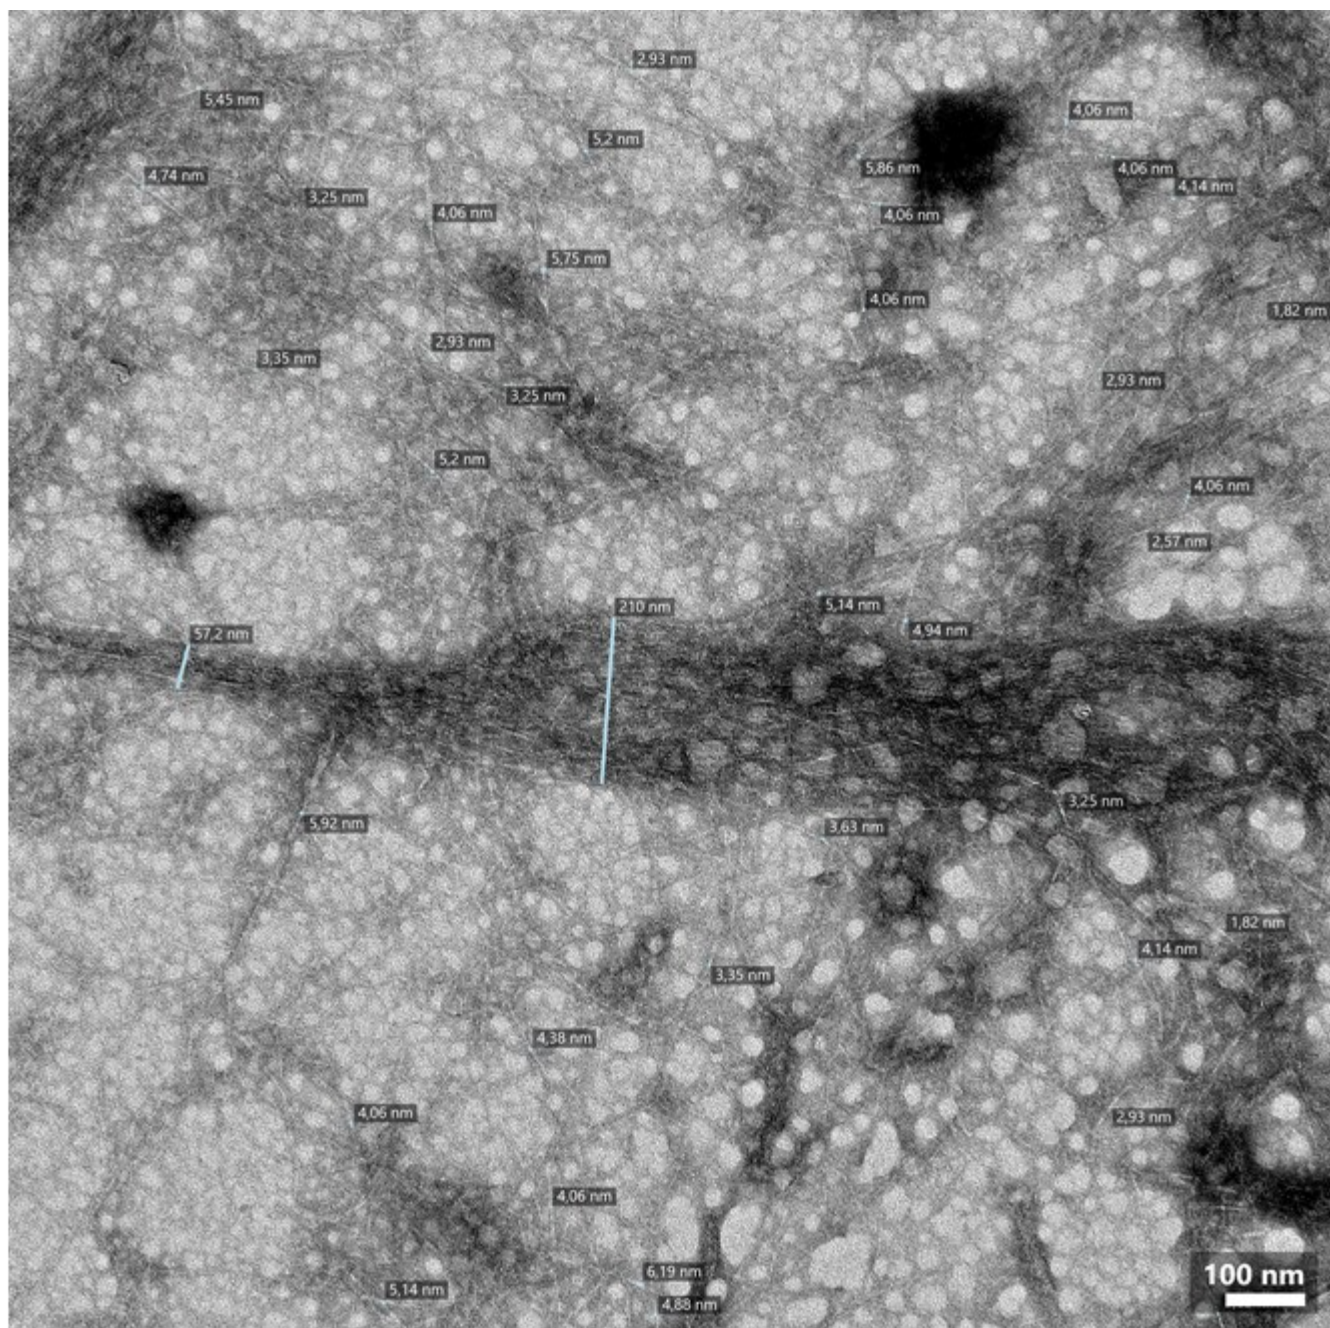

Figure S1. TEM images of AWNF1 with diameter and length measurements.

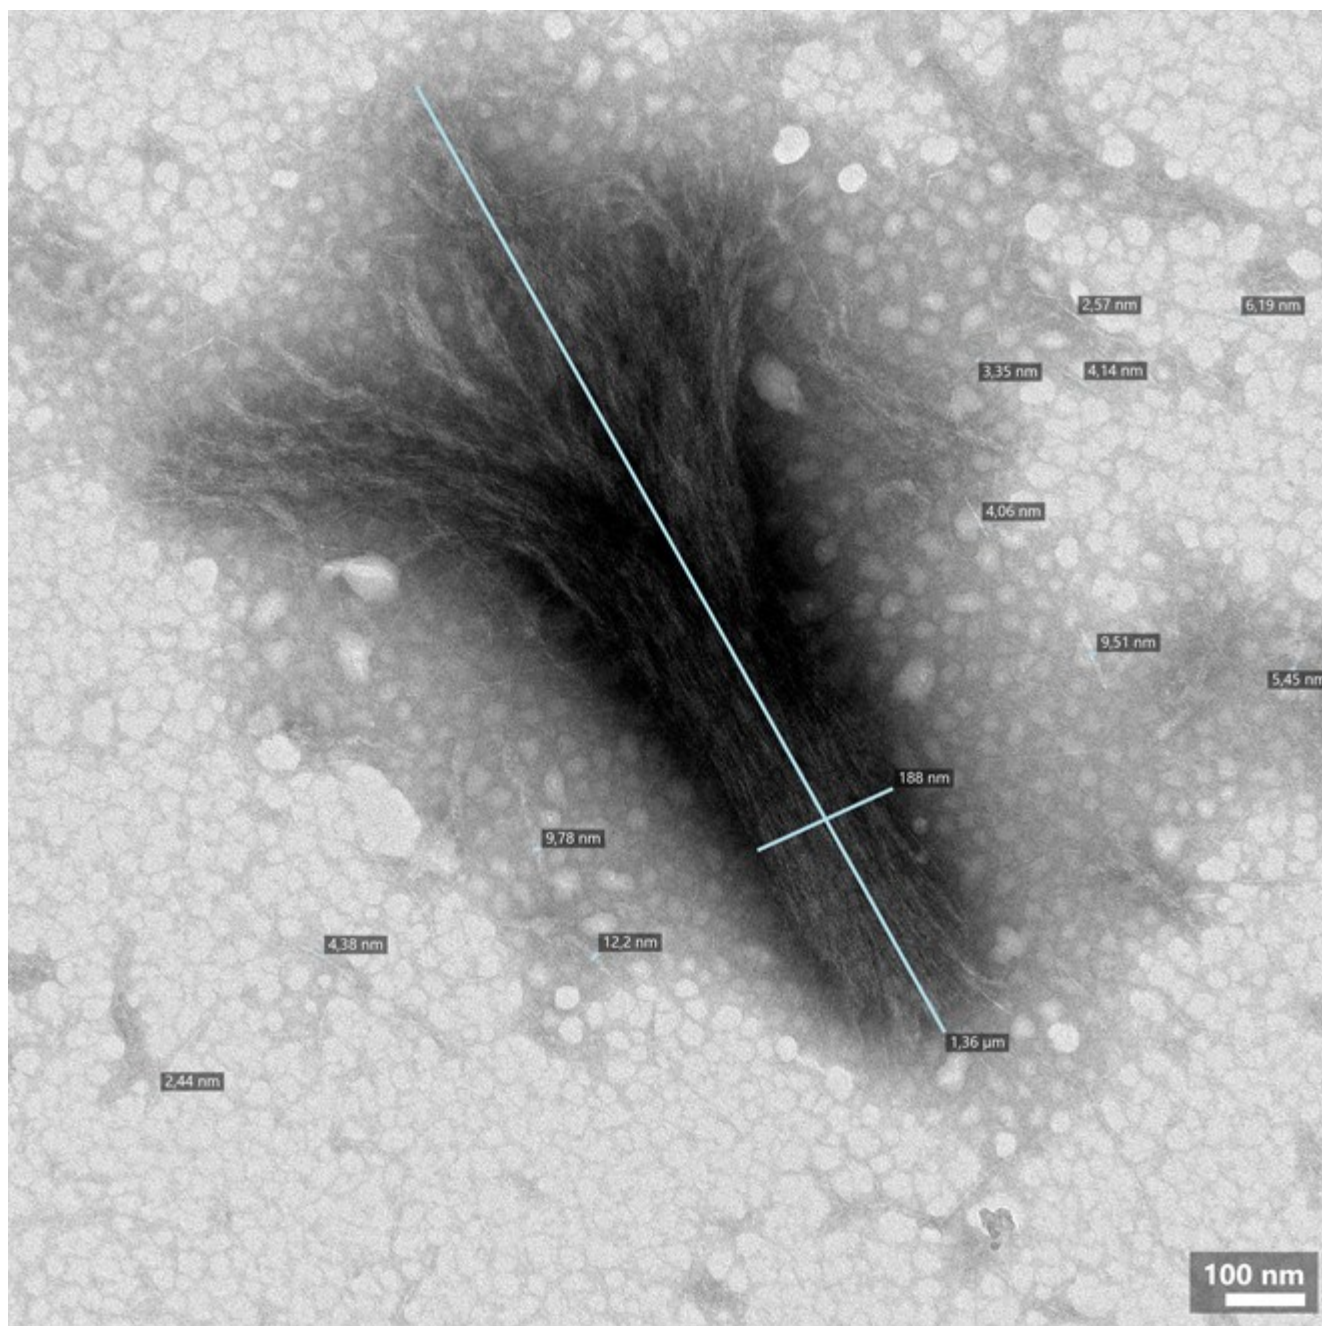



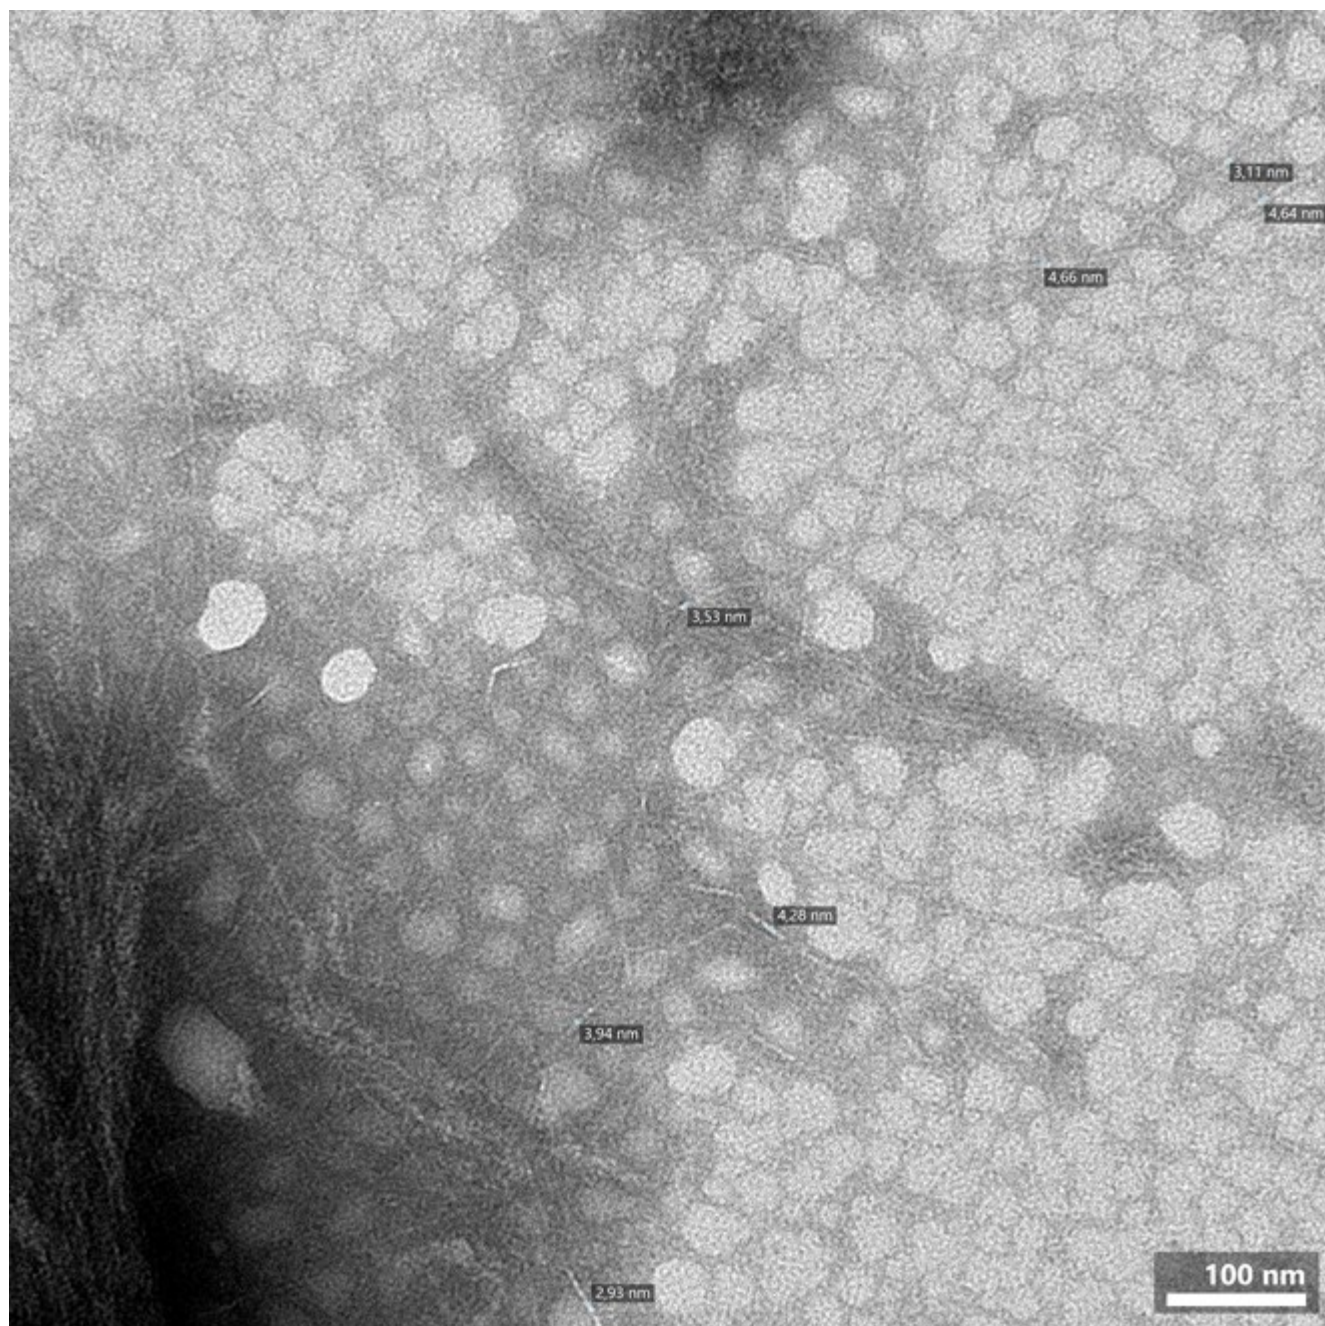

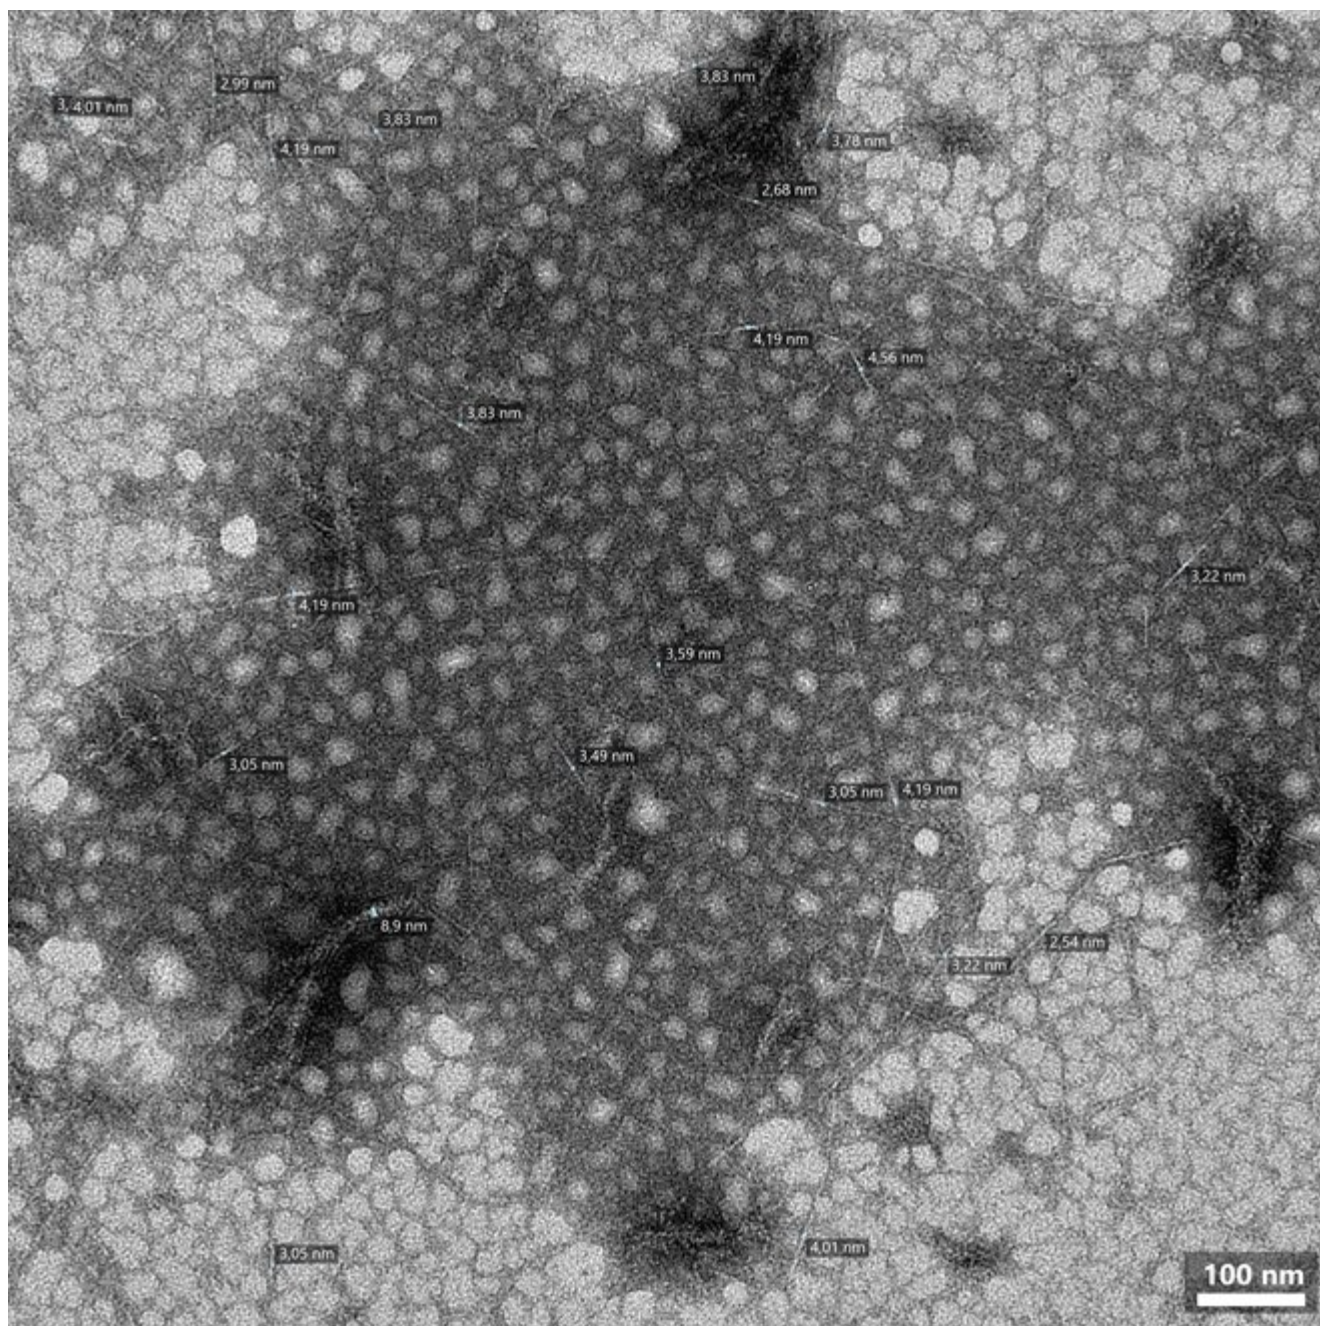



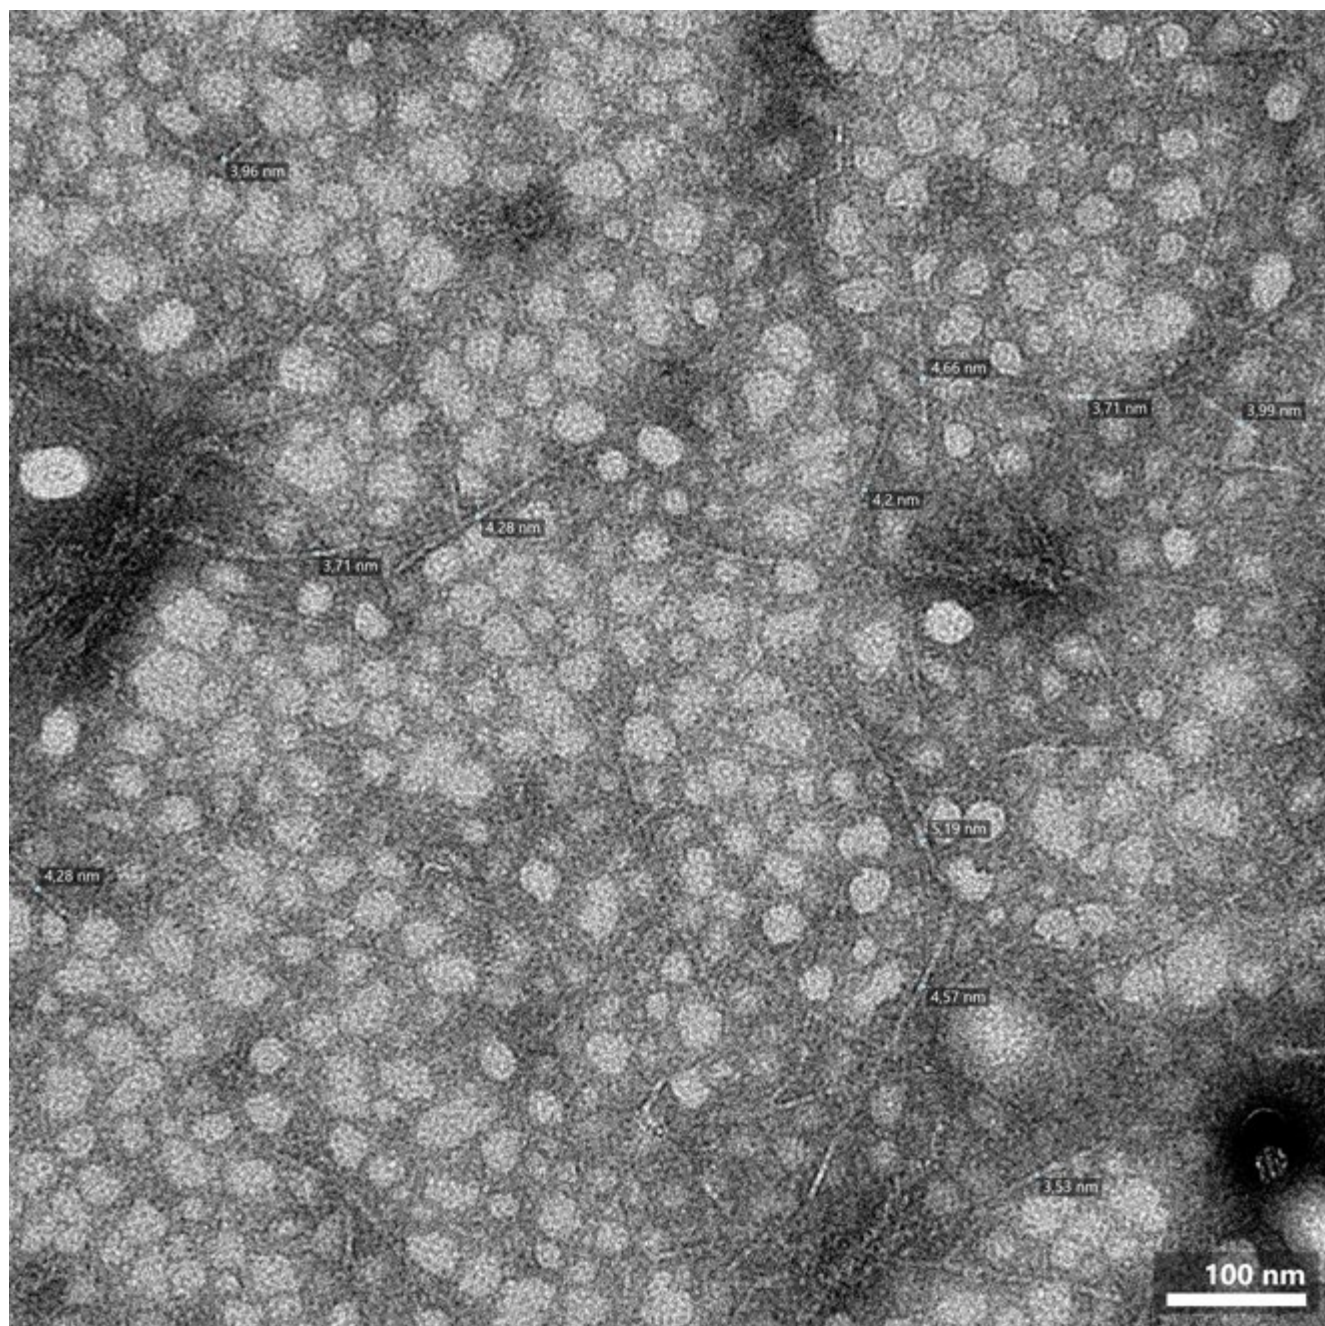



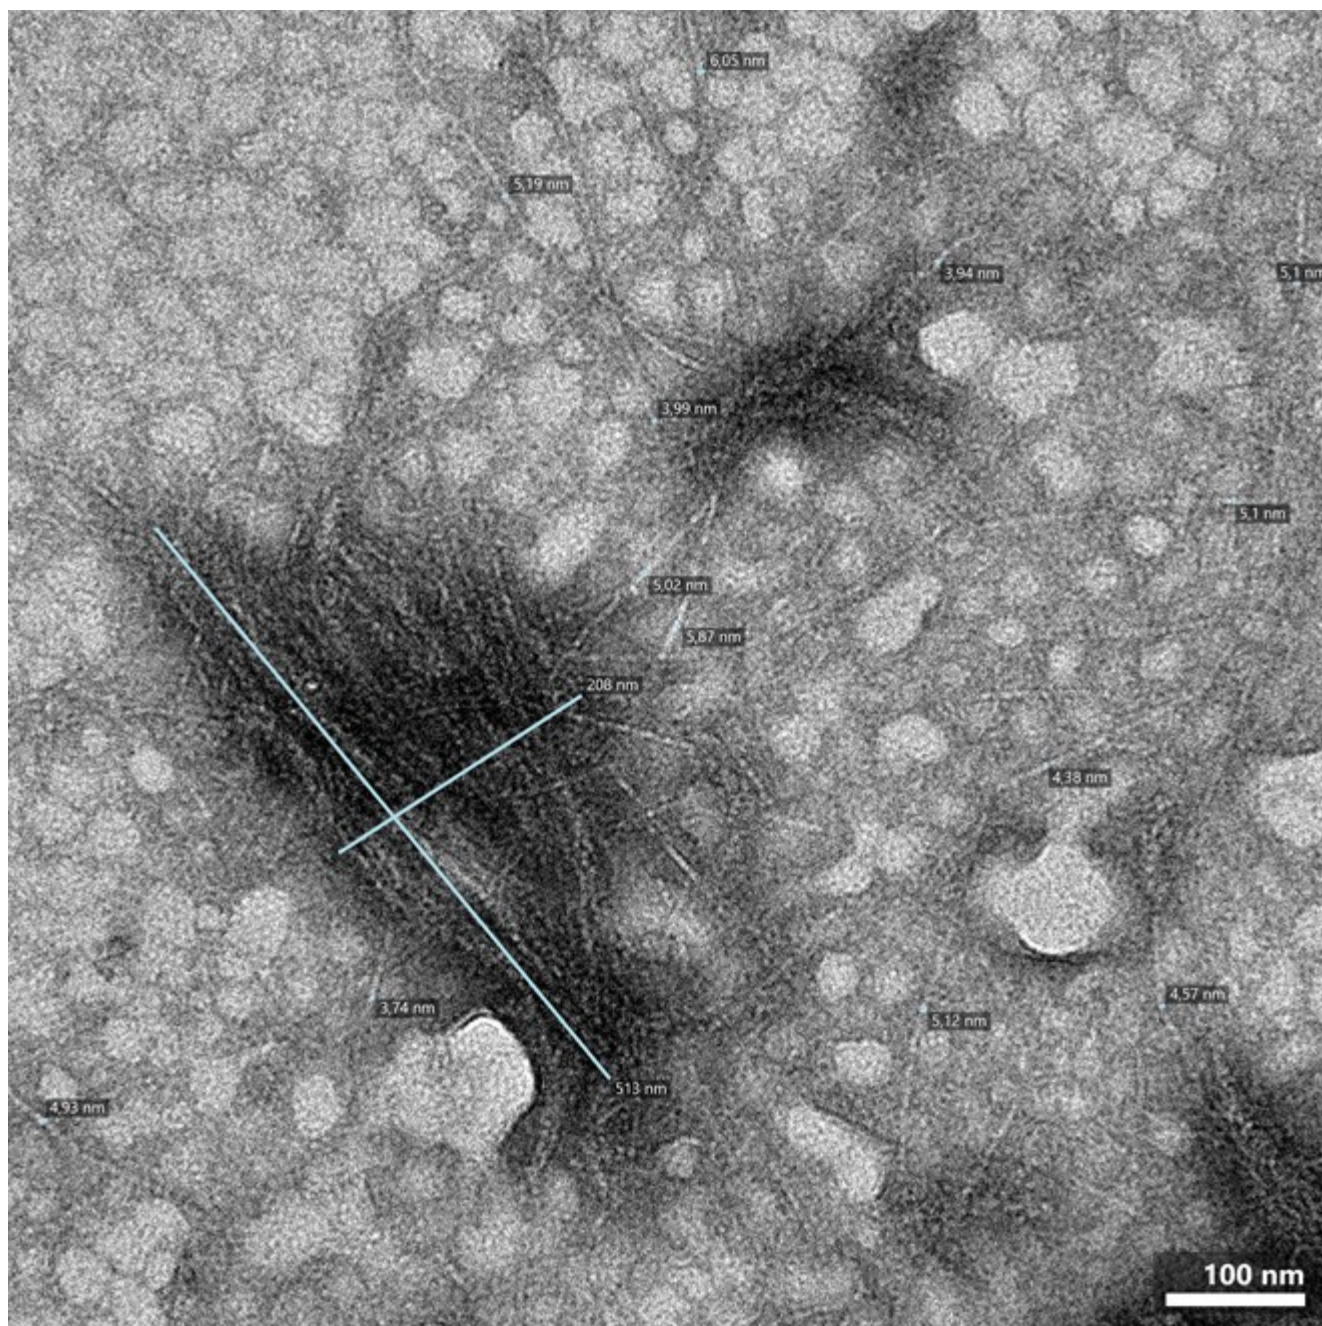



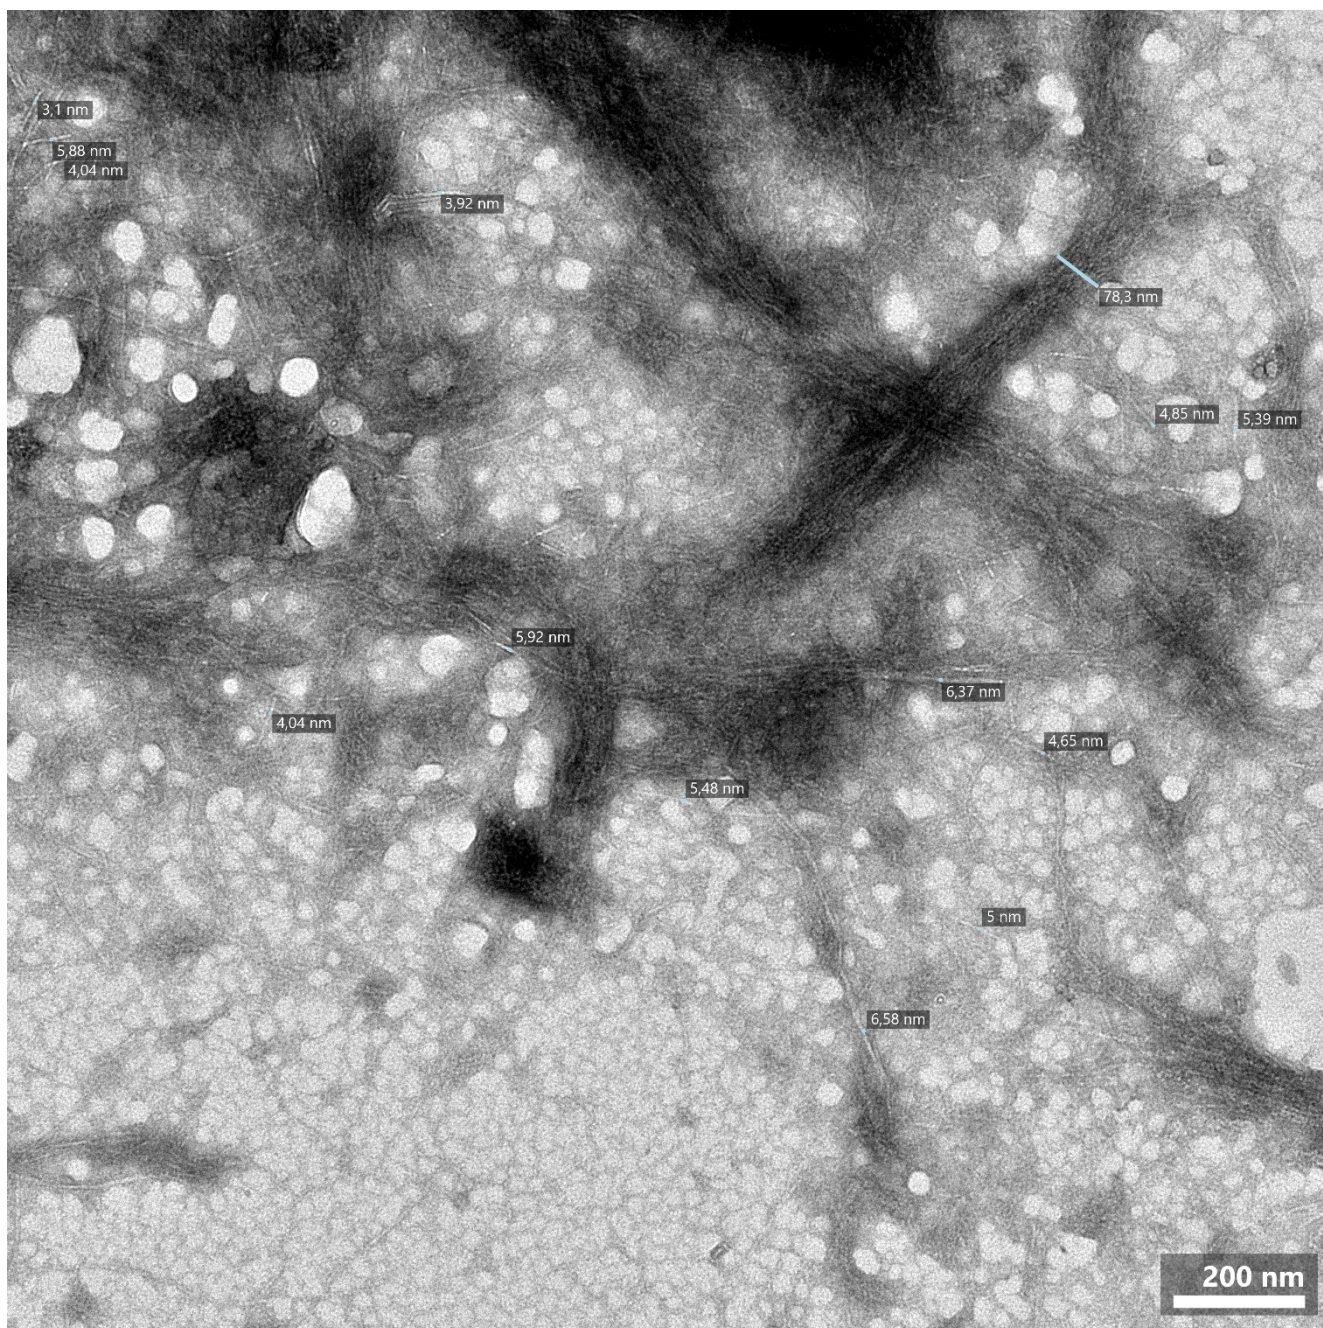



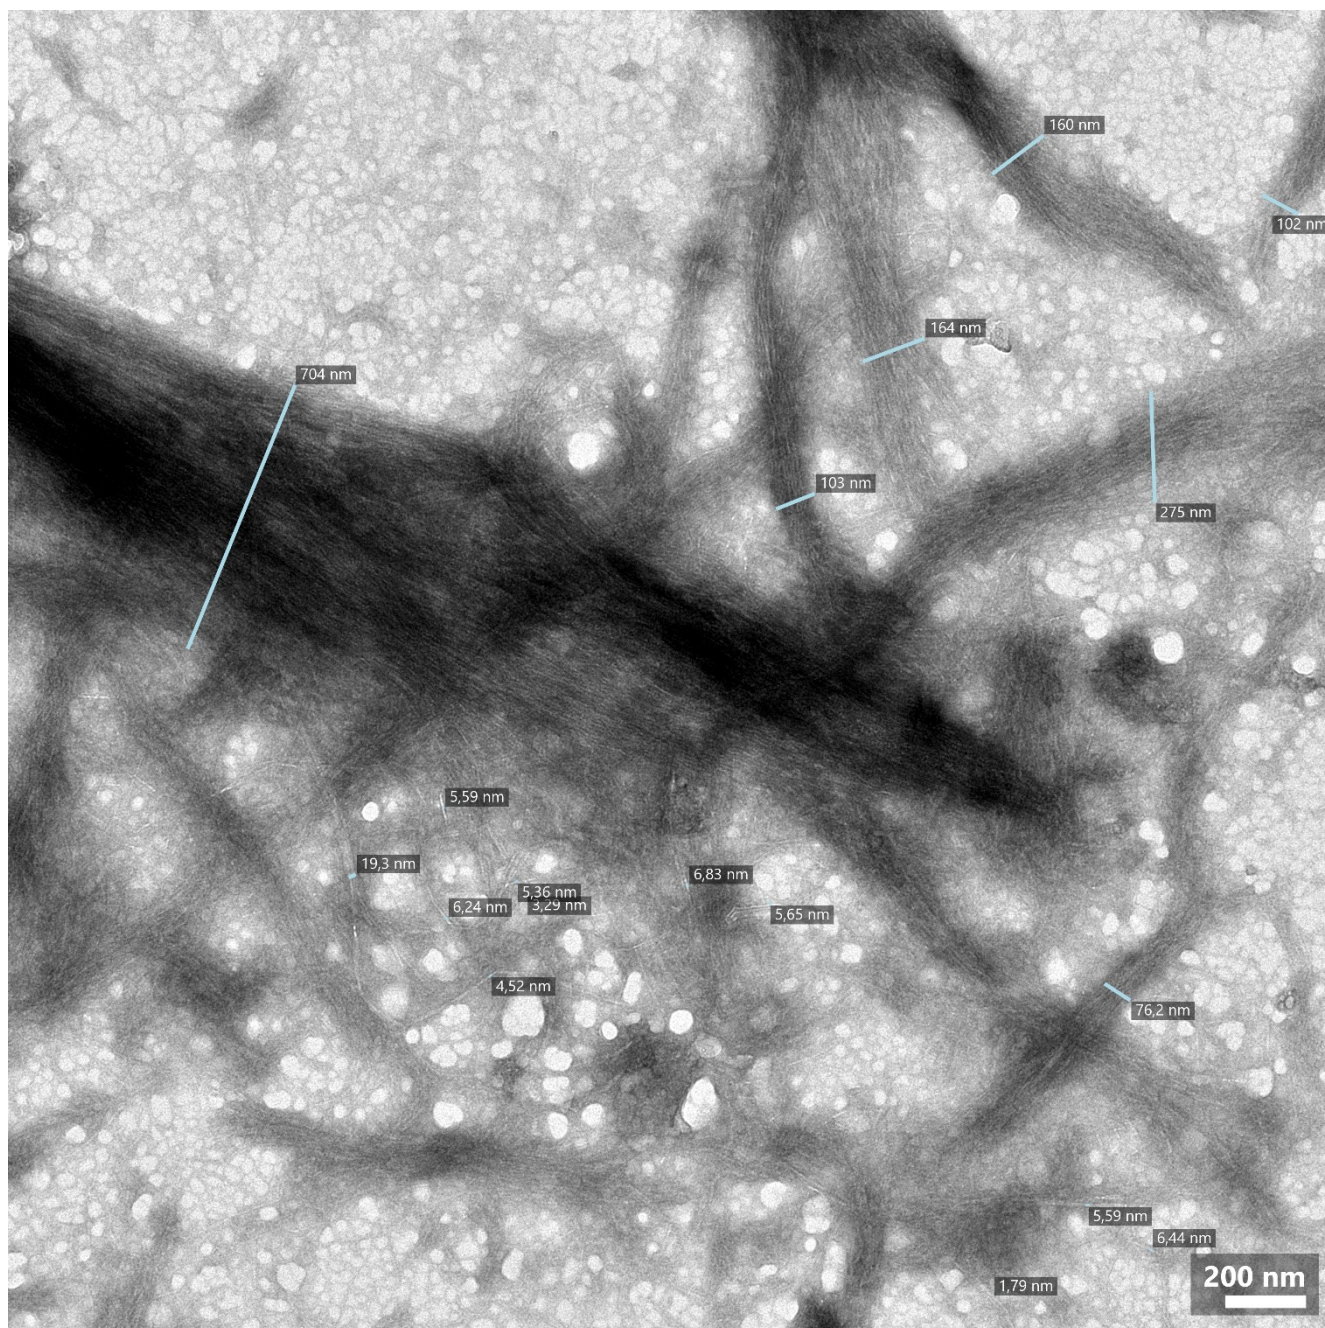



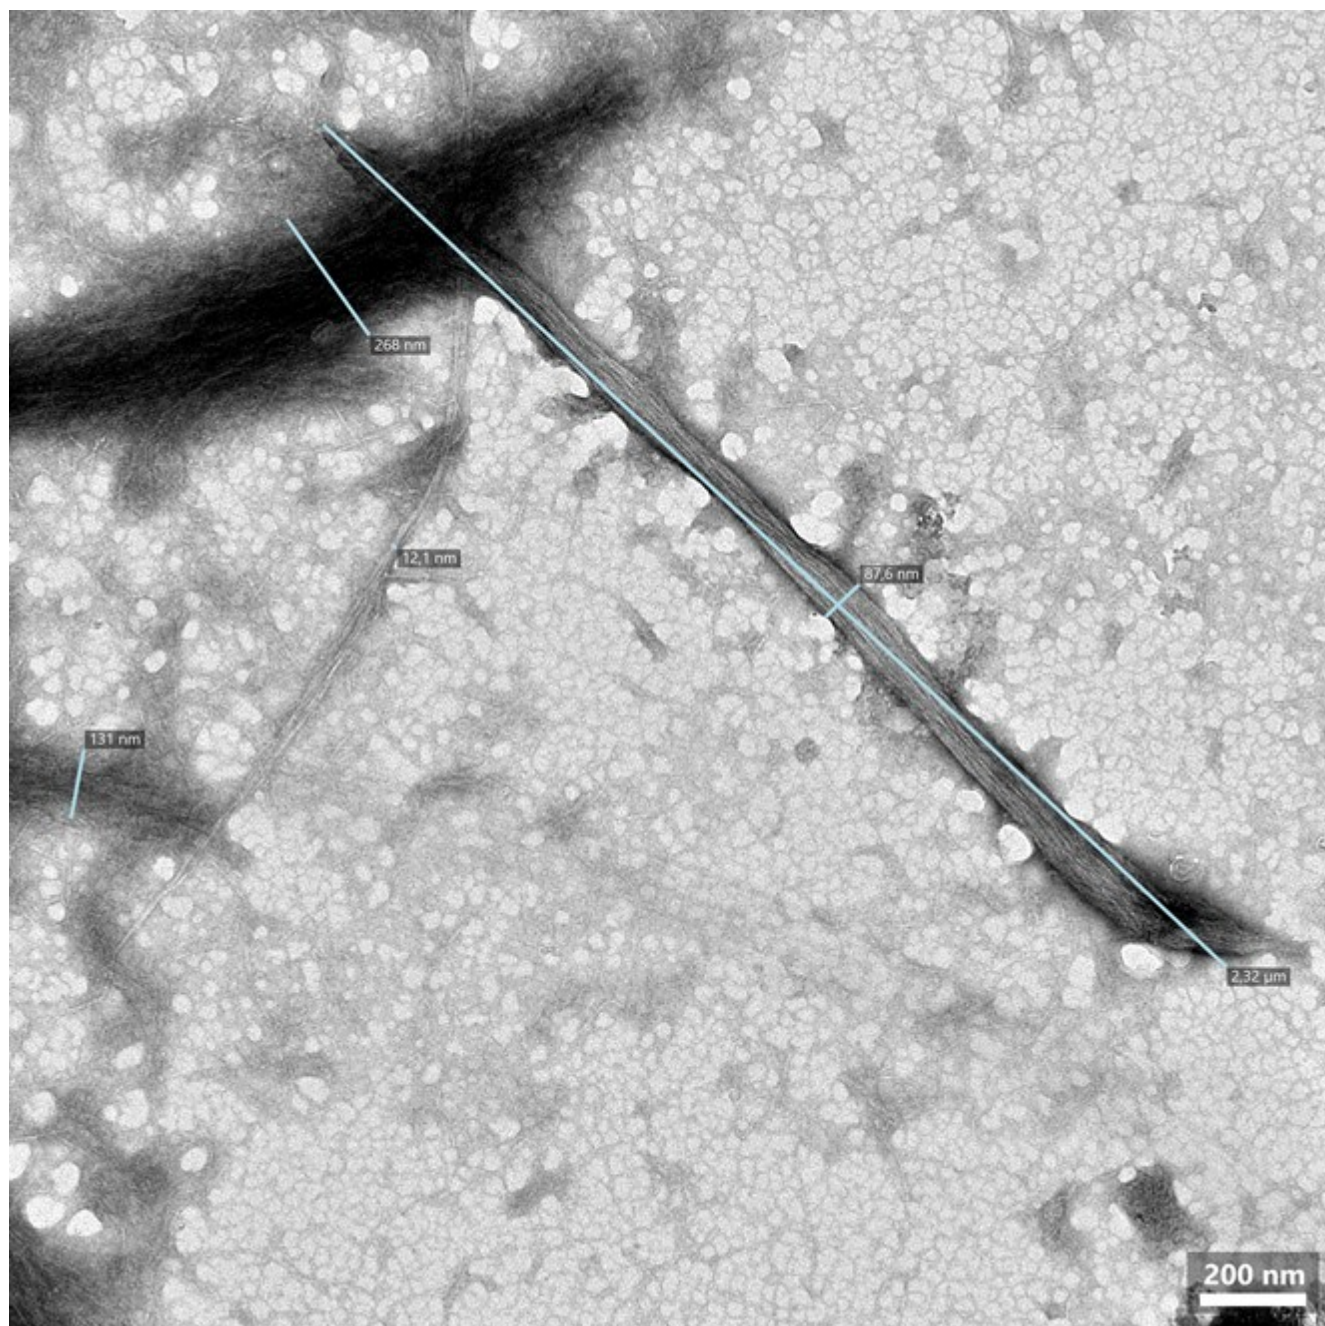

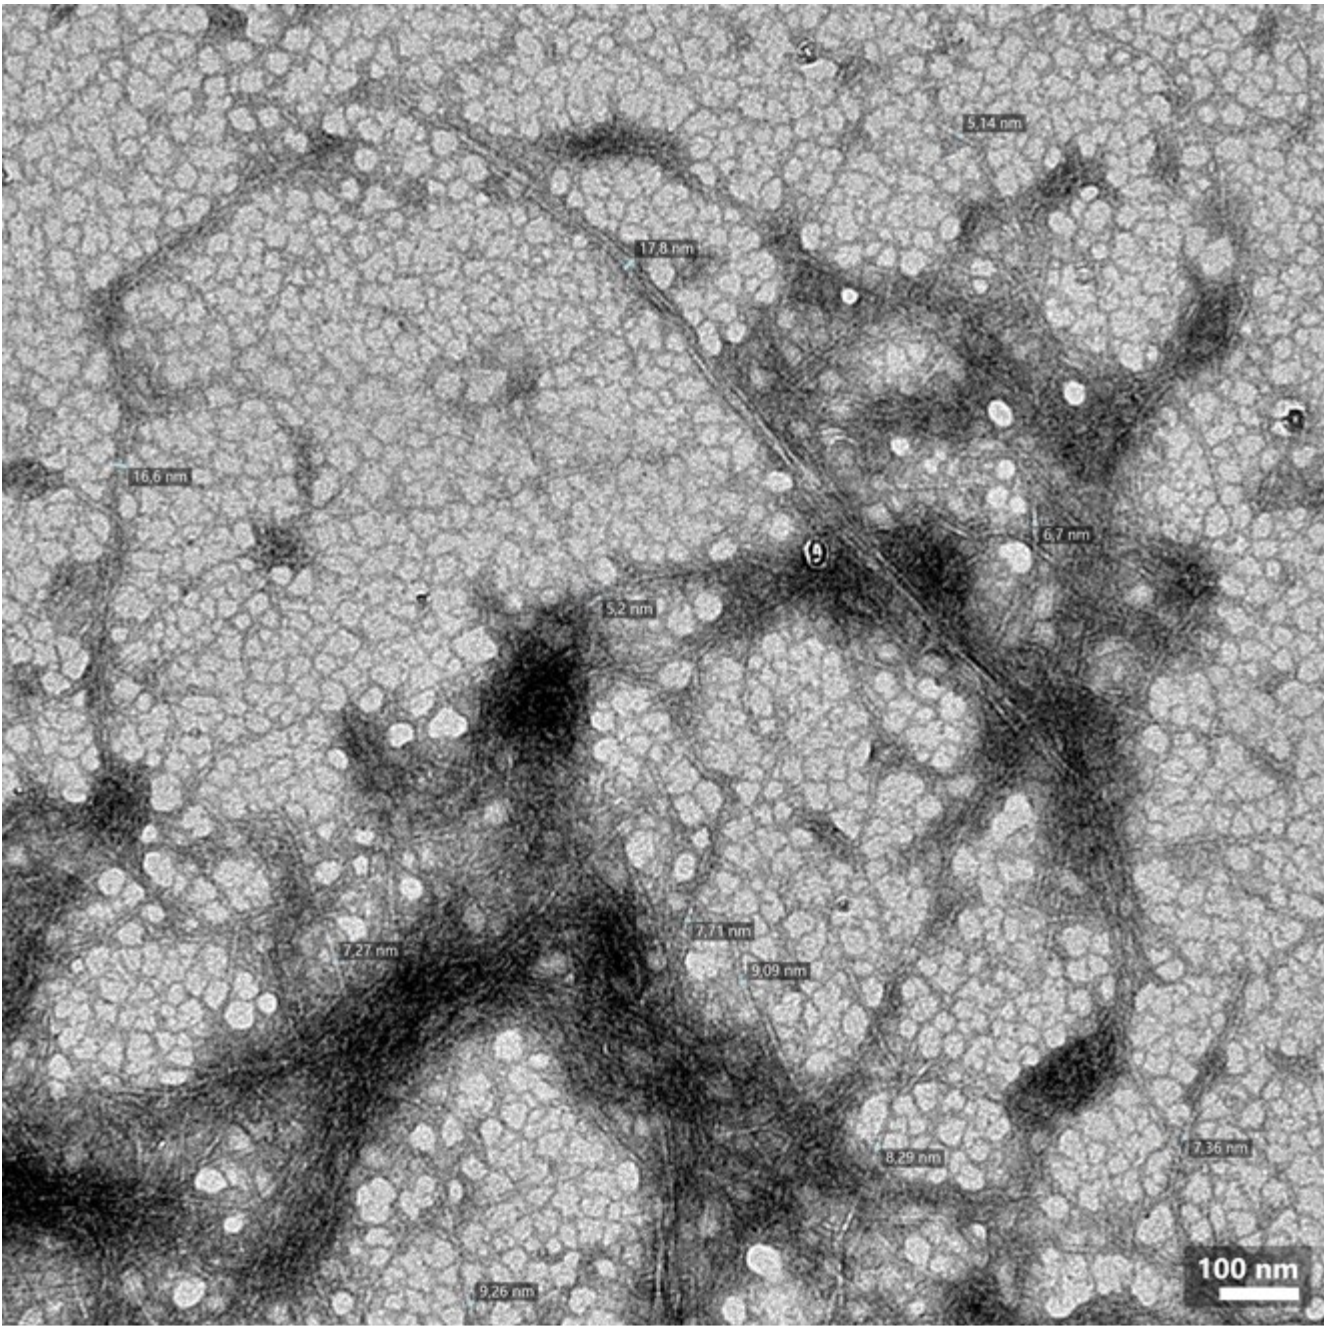



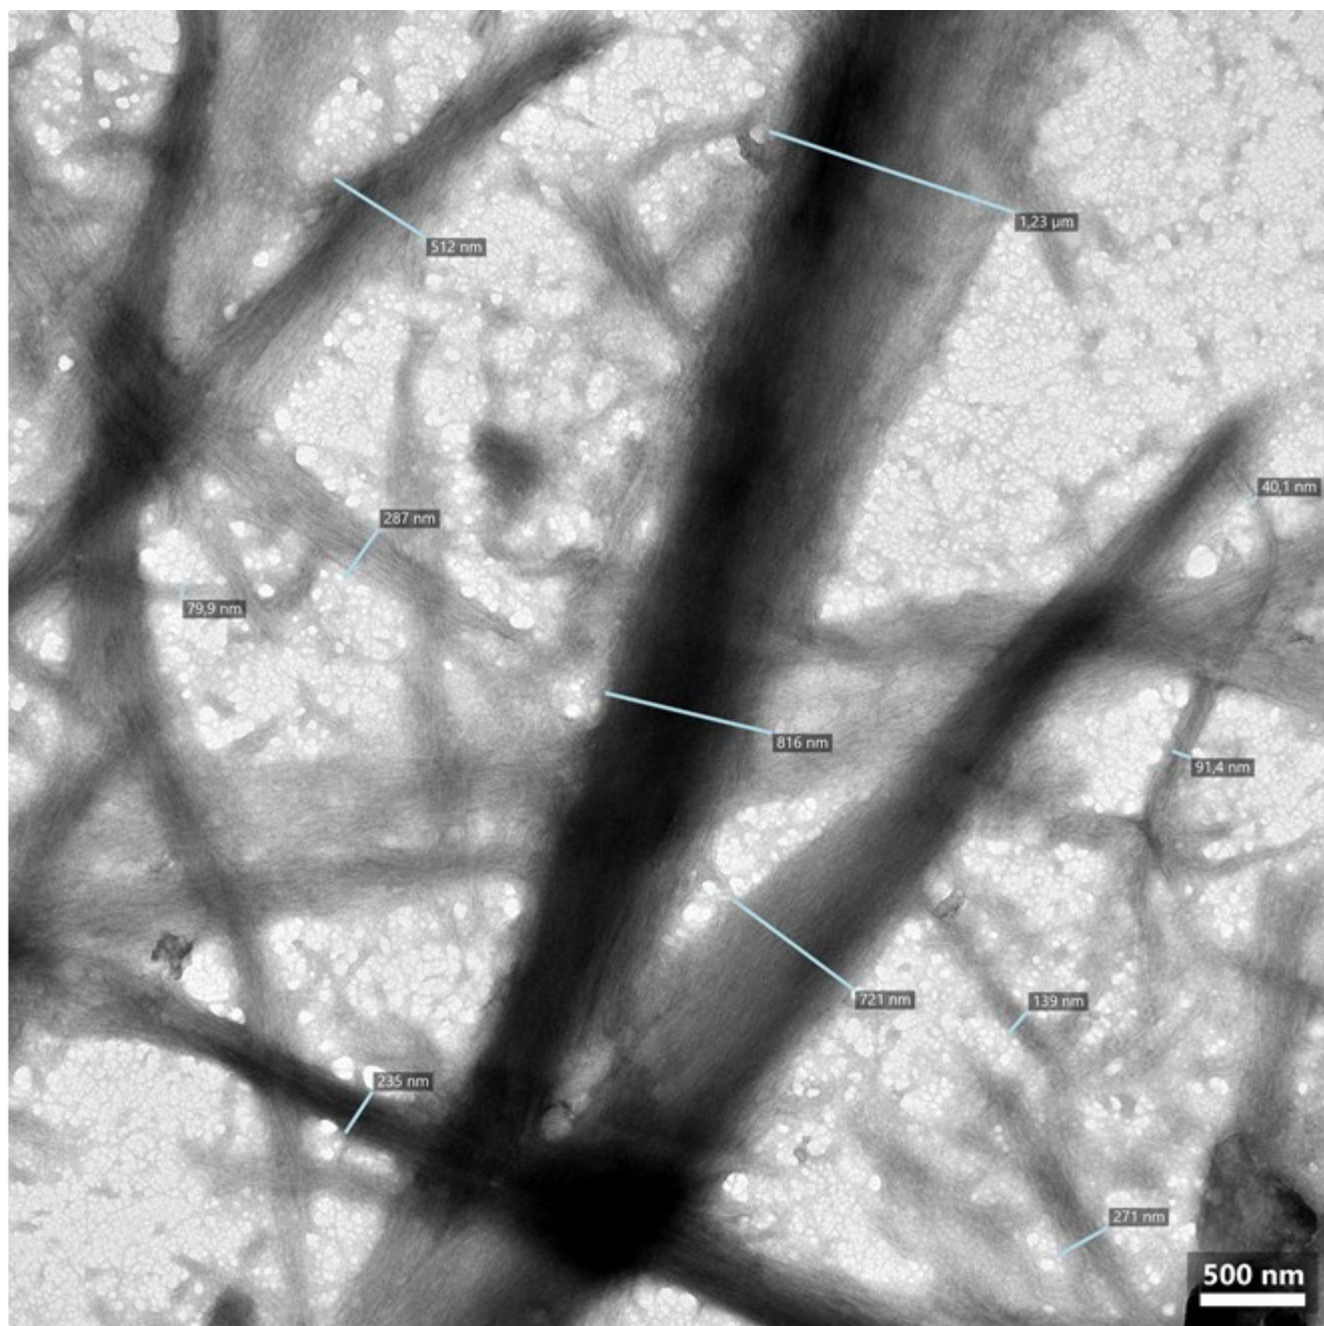

Figure S2. TEM images of AWNF2 with diameter and length measurements.

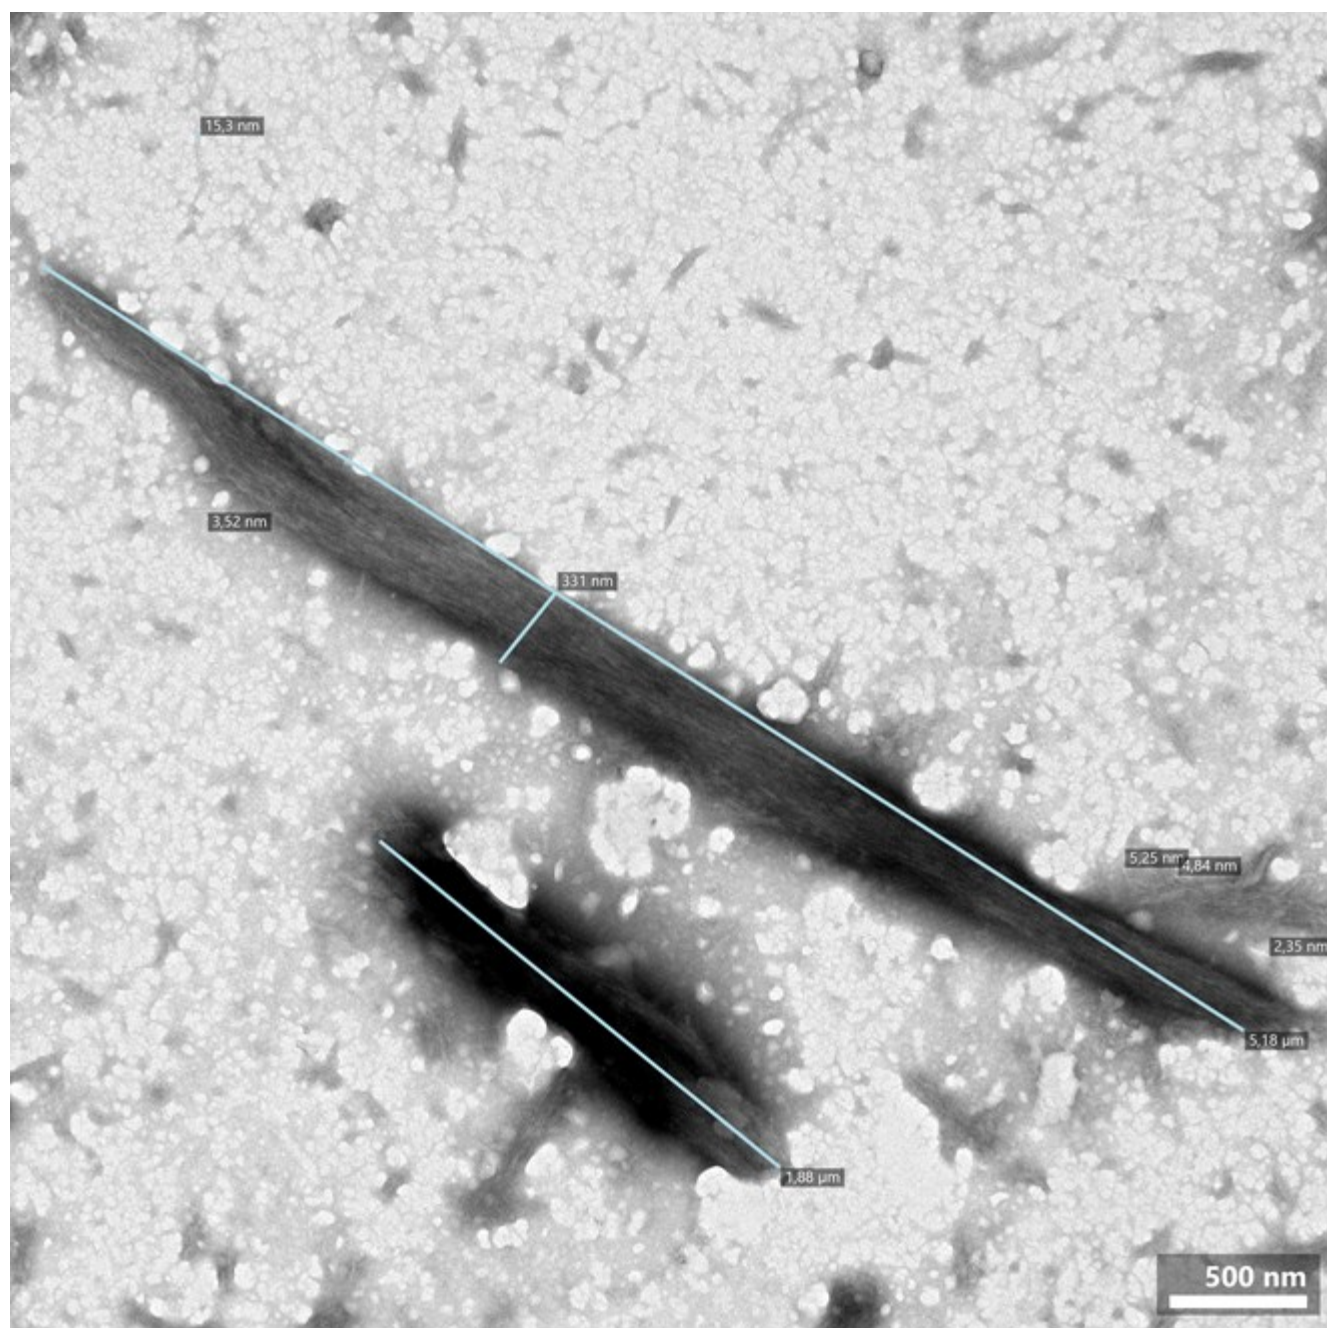



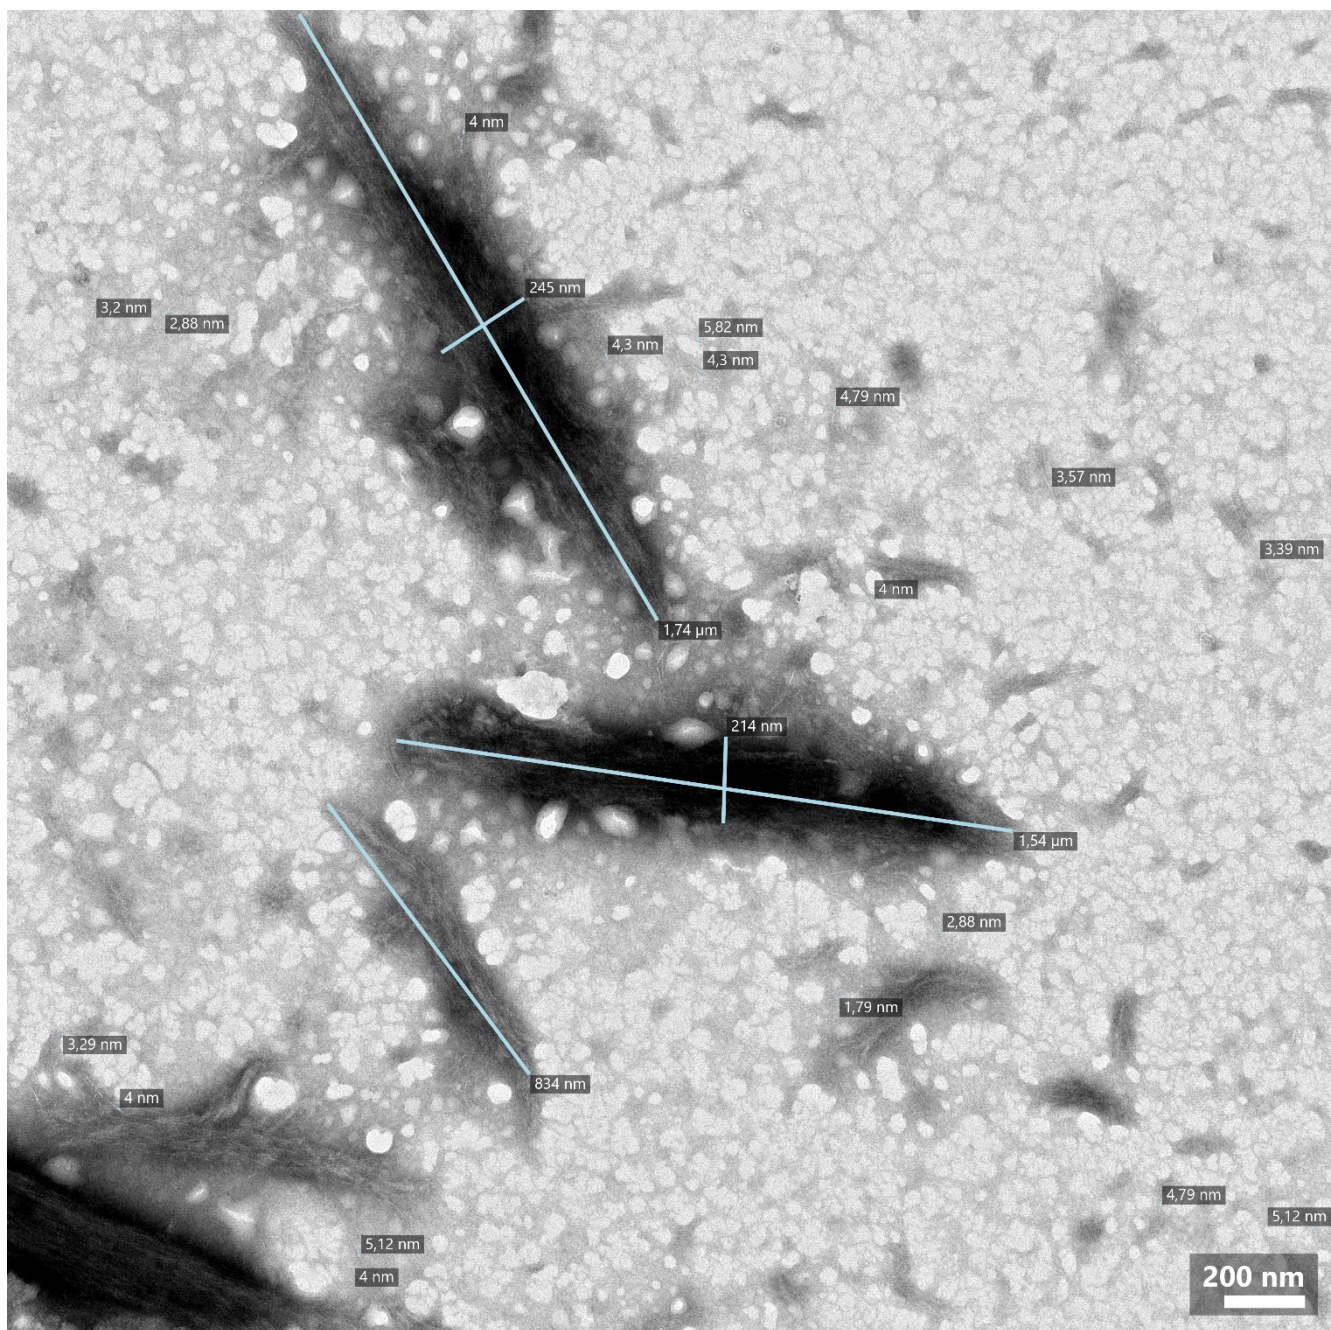



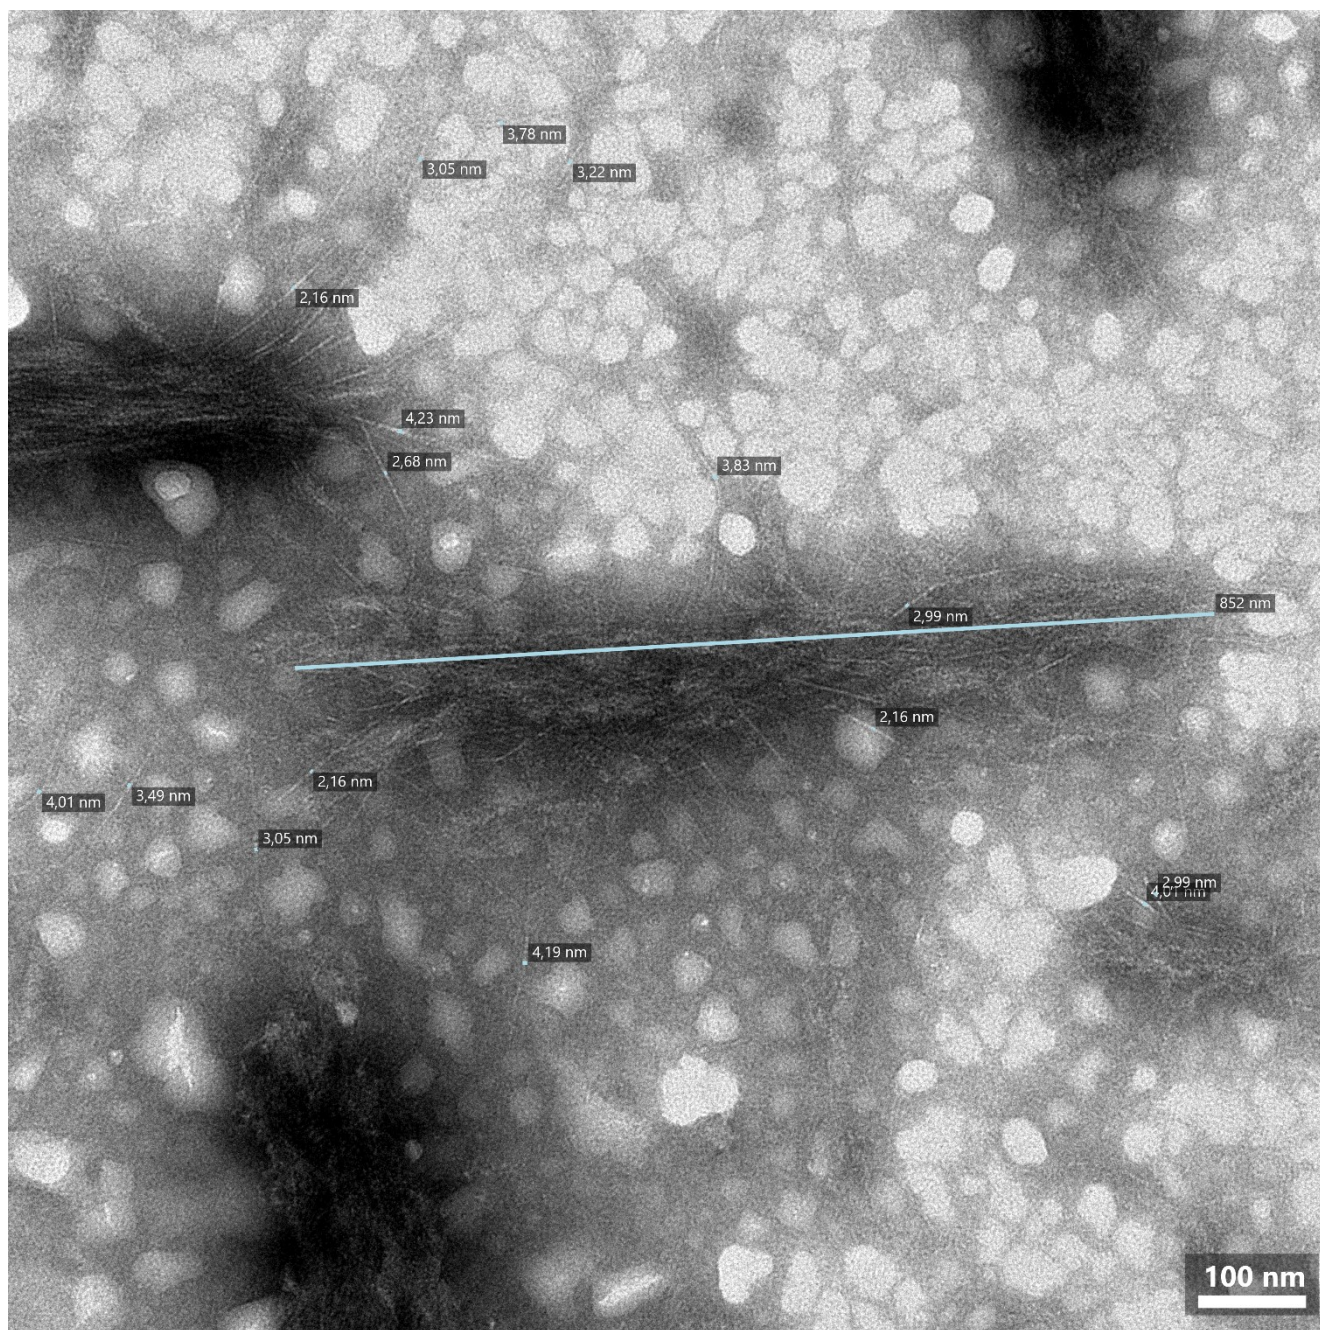

Figure S3. TEM images of AWNF3 with diameter and length measurements.
